# Supplementary figures and images for: Velocity map imaging study of the photodissociation dynamics of the allyl radical
Source: Royal Society of Chemistry journal article supplement (doi:10.1039/c9cp04758a), 2020-01-01

### Hydrogen Example - 228 nm:

Pump-probe:

Probe Only

Subtracted image:

Background

No pump signal

228 nm

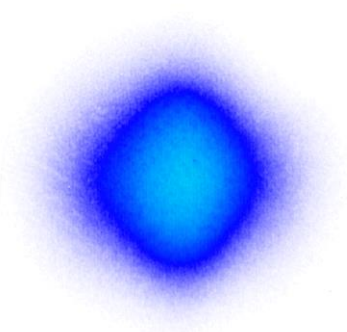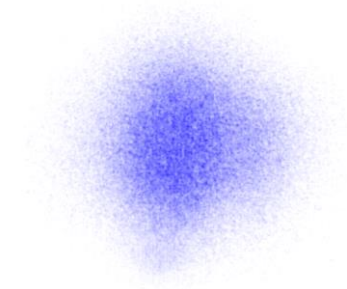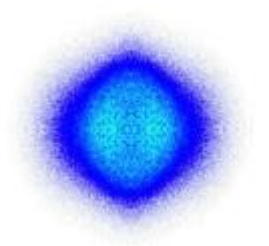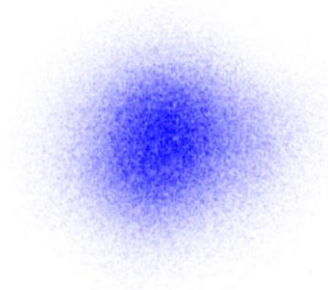

Supplement: c9cp04758a1.pdf [file c9cp04758a1.pdf]

### Methyl Example - 216 nm:

Pump-Probe:

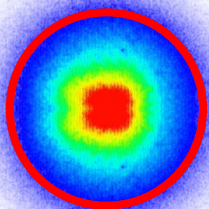

Probe:

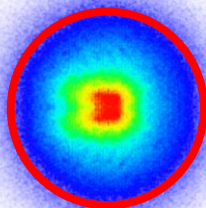

Subtracted image:

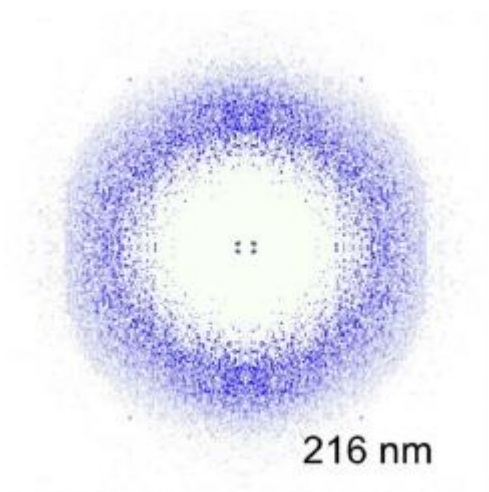

Background:

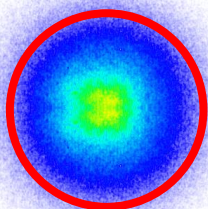

Pump:

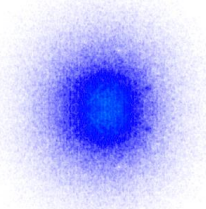

Supplement: c9cp04758a2.pdf [file c9cp04758a2.pdf]
